# Supplementary material
Source: PubMed Central journal article supplement (PMC3359944)
Supplement: supp_46.4.470_Howden_ODS.pdf [file supp_46.4.470_Howden_ODS.pdf]

## **Online Data Supplement**

Cardiac physiologic and genetic predictors of hyperoxia-induced acute lung injury in mice.

Reuben Howden, Hye-Youn Cho, Laura Miller-DeGraff, Christopher Walker, James A. Clark, Page H.

Myers, D. Clay Rouse, and Steven R. Kleeberger

## Supplemental methods

*Surgical implantation of radio-telemetry transmitter.* Inhaled isoflurane was used to anaesthetise mice during surgery, and buprenorphin (0.1 mg/Kg) was administered for post-surgical pain relief. In the skin, a 3 cm midline dorsal incision was made and a blunt instrument was used to make a subcutaneous tissue pocket. An ETA-F20 ECG transmitter (DSI; Arden Hills, MN) was placed inside the tissue pocket and sutured to the left latissimus dorsi muscle. The positive and negative ECG leads were sutured over the left superficial gluteus and right trapezius muscles respectively and routed subcutaneously. All incisions were closed using wound clips and animals were allowed five days to recover.

*Hyperoxia exposure and Measurements.* Conscious, unrestrained animals were placed individually in whole body plethysmographs (Buxco Electronics, Wilmington, NC) and allowed at least 30 minutes to acclimate before baseline ECG and pulmonary function were recorded. Circadian variation in baseline HR, HRV and pulmonary function was accounted for by recording at the same time of day. Following twenty minutes of baseline recording, mice were exposed to hyperoxia (100% oxygen) in the whole body plethysmographs. 100% oxygen gas was delivered from a liquid oxygen tank, warmed to room temperature and humidified by passing the gas through a sealed flask containing water. Mice were exposed to hyperoxia 23.5 hr/day for a maximum of 96 hours, until moribund or when HR had declined to ~200 bpm. Mouse chow and water were provided *ad libitum*.

The term HRV refers to the variance in the time intervals (typically R-R interval) between successive, normal cardiac cycles. Spectral analysis of the R-R interval series provides a unique insight into the relative variability of both the sympathetic and parasympathetic limbs of the autonomic nervous system on the sinoatrial node (1). This measurement has been used extensively in the clinical research setting to assess a number of human health concerns including aging and cardiovascular disease, and has

been shown to be reproducible (2). Low HRV has become a well-established indicator of increased cardiovascular disease risk (3, 4).

The methods used for calculating HR and HRV have been described in detail previously (5). Briefly, using specialist software (Dataquest ART analysis v3.1), R-R intervals were extracted and HR was calculated after arrhythmias were removed. HRV was assessed in the frequency domain using the Lomb periodogram method. The low frequency (LF) HRV range was set at 0.2-1.5 Hz and high frequency (HF) HRV was 1.5-5.0 Hz. Total power (TP) was determined by summation of the LF and HF range values. Minute ventilation ( $\dot{V}_E$ ) was also calculated using specialist software (Buxco Electronics, Wilmington, NC).

Additional mice used for assessment of lung injury were acclimated in unrestrained in stainless steel cages within Hazelton 1000 chambers (Lab Products, Maywood, NJ) for 23.5 hrs/day for 72 hrs. Mice were exposed continuously to >95% O<sub>2</sub> for 48, 60, or 72 hr. Parallel exposures to filtered air were done in a separate chamber. Each animal was provided mouse chow and water *ad libitum* during the exposure. Constant chamber air temperature ( $72 \pm 3^\circ$  F) and relative humidity ( $50 \pm 15\%$ ) were maintained. Immediately after the end of each exposure, mice were euthanized by sodium pentobarbital overdose (104 mg/Kg). On necropsy, right lungs from each mouse were subjected to bronchoalveolar lavage (BAL) analysis. Left lung from each mouse was fixed with Zn formalin for histopathology. All animal use was approved by the NIEHS Animal Care and Use Committee.

*Bronchoalveolar lavage (BAL) analysis.* Bronchoalveolar lavage (BAL) was performed *in situ* four times with Hanks' balanced salt solution (HBSS, 0.5 ml/20g b.w.; pH 7.2–7.4) and the recovered BAL fluid (BALF) was immediately cooled in ice. BALF returns were centrifuged (1000g, 10 min at 4°C), and the supernatant from the first BALF return was separated for determination of total protein (a marker of lung protein permeability). Protein concentration was measured using a Bradford reagent as indicated in the manufacturer's procedure (Bio Rad

laboratories, Hercules, CA). Pooled cell pellets from all BALF were combined and resuspended in 1 ml of HBSS, and the total cell number per ml BAL was counted with a hemacytometer.

*Lung tissue preparation for histopathology.* The left lung lobe isolated from each mouse was inflated gently and fixed with zinc formalin, trimmed at the level of G5 (proximal) and G11 (distal), embedded in paraffin, and sectioned (5 nm). Tissue sections were histochemically stained with hematoxylin and eosin (H&E) for morphological analysis of pulmonary injury.

*Genetic linkage analysis.* Genome wide scans for quantitative trait loci (QTLs) were performed using the phenotypes from 27 RI lines and the Gene Network ([www.genenetwork.org](http://www.genenetwork.org)) WebQTL resource. AXB19a and AXB19b were excluded from the linkage analyses as they are considered sister strains with AXB19 (<http://jaxmice.jax.org/jaxnotes/504/504e.html>) and thus do not provide additional informative genetic insight. Marker regression analysis was used across the genome at the location of available marker loci using the RI strain phenotype (basal HR, LF, HF, TP, pulmonary function and HRTI, LFTI, HFTI, TPTI and  $\dot{V}_E$  TI) data. Hypothetical QTLs were evaluated at each marker locus and the statistical significance of the QTLs was estimated by the base-10 likelihood of the odds (LOD) score. Data that were not distributed normally were power transformed before using the data for linkage analyses. 1000 permutation tests were used to establish the suggestive and significance thresholds for the genome wide linkage map curves. LOD curves on the linkage map are provided for each chromosome, and graphically represent the approximate position of identified QTL(s).

## References.

- E1. Malpas, S. C. 2002. Neural influences on cardiovascular variability: possibilities and pitfalls. *Am J Physiol Heart Circ Physiol* 282(1):H6-20.
- E2. Marks, B. L., Lightfoot, J. T. 1999. Reproducibility of resting heart rate variability with short sampling periods. *Can J Appl Physiol* 24(4):337-48.
- E3. Bigger, J. T., Jr, J. L. Fleiss, R. C. Steinman, L. M. Rolnitzky, W. J. Schneider, and P. K. Stein. 1995. RR Variability in Healthy, Middle-Aged Persons Compared With Patients With Chronic Coronary Heart Disease or Recent Acute Myocardial Infarction. *Circulation* 91(7):1936-1943.
- E4. Stein, P., P.K., and M. Kleiger, R.E. 1999. Insights from the study of heart rate variability. *Annual Review of Medicine* 50(1):249-261.
- E5. Howden, R., E. Liu, L. Miller-DeGraff, H. L. Keener, C. Walker, J. A. Clark, P. H. Myers, D. C. Rouse, T. Wiltshire, and S. R. Kleeberger. 2008. The genetic contribution to heart rate and heart rate variability in quiescent mice. *Am J Physiol Heart Circ Physiol* 295(1):H59-68.

Supplemental Table E1. Strain, age (wks) and body mass (g  $\pm$  SEM) of inbred and recombinant inbred strains used in the study.

| <b>Strain</b> | <b>n</b> | <b>Age (wks)</b> | <b>Mass <math>\pm</math> SEM (g)</b> |
|---------------|----------|------------------|--------------------------------------|
| A/J           | 4        | 10.5             | 21.5 $\pm$ 1.0                       |
| B57BL/6J      | 4        | 10               | 24.4 $\pm$ 0.5                       |
| C3H/HeJ       | 4        | 12.4             | 25.6 $\pm$ 0.8                       |
| DBA/2J        | 4        | 14.2             | 27.3 $\pm$ 1.4                       |
| AXB1/PgnJ     | 4        | 12.6             | 29.0 $\pm$ 2.8                       |
| AXB2/PgnJ     | 4        | 11.9             | 25.3 $\pm$ 0.8                       |
| AXB4/PgnJ     | 4        | 10.9             | 19.5 $\pm$ 0.2                       |
| AXB5/PgnJ     | 4        | 8.9              | 23.2 $\pm$ 0.7                       |
| AXB6/PgnJ     | 4        | 9.4              | 25.5 $\pm$ 0.6                       |
| AXB8/PgnJ     | 2        | 7.9              | 19.6 $\pm$ 0.5                       |
| AXB10/PgnJ    | 4        | 10.3             | 23.6 $\pm$ 0.9                       |
| AXB12/PgnJ    | 4        | 11.9             | 24.4 $\pm$ 1.0                       |
| AXB13/PgnJ    | 4        | 7.5              | 20.3 $\pm$ 0.5                       |
| AXB15/PgnJ    | 4        | 12.7             | 27.1 $\pm$ 0.7                       |
| AXB17/PgnJ    | 4        | 12.7             | 24.8 $\pm$ 0.9                       |
| AXB19a/PgnJ   | 4        | 8.7              | 21.2 $\pm$ 0.7                       |
| AXB19/PgnJ    | 4        | 10.6             | 21.1 $\pm$ 0.5                       |
| AXB19b/PgnJ   | 3        | 11.6             | 21.9 $\pm$ 1.3                       |
| AXB23/PgnJ    | 4        | 9.4              | 24.5 $\pm$ 0.1                       |
| AXB24/PgnJ    | 4        | 11.3             | 22.4 $\pm$ 0.4                       |
| BXA1/PgnJ     | 4        | 11.1             | 29.4 $\pm$ 0.4                       |
| BXA2/PgnJ     | 4        | 20.9             | 38.4 $\pm$ 1.4                       |
| BXA4/PgnJ     | 3        | 21.4             | 27.5 $\pm$ 0.5                       |
| BXA7/PgnJ     | 4        | 13.6             | 29.7 $\pm$ 0.4                       |
| BXA8/PgnJ     | 4        | 12.9             | 25.0 $\pm$ 0.8                       |
| BXA11/PgnJ    | 4        | 16.4             | 34.6 $\pm$ 2.6                       |
| BXA12/PgnJ    | 2        | 13.1             | 22.7 $\pm$ 1.9                       |
| BXA13/PgnJ    | 4        | 13.0             | 24.8 $\pm$ 1.1                       |
| BXA14/PgnJ    | 4        | 17.4             | 28.5 $\pm$ 0.7                       |
| BXA16/PgnJ    | 4        | 15.4             | 25.2 $\pm$ 0.5                       |
| BXA24/PgnJ    | 4        | 12.7             | 29.7 $\pm$ 0.6                       |
| BXA25/PgnJ    | 4        | 12.6             | 25.8 $\pm$ 0.2                       |
| BXA26/PgnJ    | 4        | 12.7             | 22.3 $\pm$ 0.4                       |

Supplemental Table E2. Genes located with the significant [chromosomes 3 (A) and 5 (B)] and suggestive [chromosome 9 (C)] QTLs. Bolded genes contain non-synonymous coding SNPs that are informative in A/J and B6 mice, and associated with differential responses to hyperoxia in the RI strains. The green shaded genes (chromosome 9) delineate those that were within the statistically significant interval of the entire QTL.

A. Chromosome 3 QTL genes.

| Gene Symbol           | Mbp Start (mm9)  | Gene Length (Kb) | SNP Count  | SNP Density (SNP/Kb) | Human Chr | Gene Description                     |
|-----------------------|------------------|------------------|------------|----------------------|-----------|--------------------------------------|
| 4932443G14            | 49.129601        | 41.68            | 94         | 2.255278             |           | hypothetical protein 49324...        |
| <b><i>Pcdh18</i></b>  | <b>49.547217</b> | <b>14.021</b>    | <b>8</b>   | <b>0.570573</b>      | <b>4</b>  | <b>protocadherin 18</b>              |
| <b><i>Slc7a11</i></b> | <b>50.168857</b> | <b>78.678</b>    | <b>423</b> | <b>5.376344</b>      | <b>4</b>  | <b>solute carrier family 7 (c...</b> |
| 5830415G21Rik         | 50.379107        | 1.384            | 4          | 2.890173             |           | RIKEN cDNA 5830415G21 gene           |
| <i>Ccrn4l</i>         | 51.028368        | 27.208           | 90         | 3.307851             | 4         | CCR4 carbon catabolite rep...        |
| <i>Elf2</i>           | 51.059586        | 70.323           | 61         | 0.867426             | 4         | E74-like factor 2                    |
| 4930577N17Rik         | 51.080682        | 1.529            | 2          | 1.308044             |           | RIKEN cDNA 4930577N17 gene           |
| 4930583H14Rik         | 51.192337        | 8.094            | 34         | 4.200642             |           | RIKEN cDNA 4930583H14 gene           |
| <i>Ndufc1</i>         | 51.2094          | 3.477            | 14         | 4.02646              | 4         | NADH dehydrogenase (ubiqui...        |
| <i>Narg1</i>          | 51.219937        | 59.969           | 69         | 1.150594             | 4         | NMDA receptor-regulated ge...        |
| <i>Rab33b</i>         | 51.287887        | 12.247           | 0          | 0                    | 4         | RAB33B, member of RAS onco...        |
| <i>Setd7</i>          | 51.319239        | 45.506           | 1          | 0.021975             |           | SET domain containing (lys...        |
| 5430433H01Rik         | 51.386227        | 0.542            | 0          | 0                    |           | RIKEN cDNA 5430433H01 gene           |
| <i>Mgst2</i>          | 51.465114        | 21.483           | 1          | 0.046548             | 4         | microsomal glutathione S-t...        |
| <i>Maml3</i>          | 51.491536        | 417.392          | 10         | 0.023958             | 4         | mastermind like 3 (Drosoph...        |
| 3110080O07Rik         | 51.633308        | 0.995            | 0          | 0                    |           | RIKEN cDNA 3110080O07 gene           |
| 5031434O11Rik         | 51.654787        | 0.05             | 0          | 0                    |           | RIKEN cDNA 5031434O11 gene           |

B. Chromosome 5 QTL genes.

| Gene Symbol         | Mbp Start (mm9)   | Gene Length (Kb) | SNP Count | SNP Density (SNP/Kb) | Human Chr | Gene Description                     |
|---------------------|-------------------|------------------|-----------|----------------------|-----------|--------------------------------------|
| <i>Ppp1cc</i>       | 122.608287        | 16.991           | 1         | 0.058855             | 12        | protein phosphatase 1, cat...        |
| <b><i>Hvcn1</i></b> | <b>122.659745</b> | <b>32.561</b>    | <b>5</b>  | <b>0.153558</b>      | <b>12</b> | <b>hydrogen voltage-gated cha...</b> |
| <i>Tect1</i>        | 122.691523        | 22.946           | 1         | 0.043581             | 12        | tectonic 1                           |
| <i>Pptc7</i>        | 122.734406        | 39.884           | 12        | 0.300873             | 12        | PTC7 protein phosphatase h...        |
| <i>Rad9b</i>        | 122.775516        | 28.688           | 40        | 1.394311             | 12        | RAD9 homolog B (S. cerevis...        |
| <i>Vps29</i>        | 122.804421        | 8.875            | 27        | 3.042254             | 12        | vacuolar protein sorting 2...        |
| <i>Atpbd1c</i>      | 122.822516        | 10.26            | 53        | 5.165692             | 12        | ATP binding domain 1 famil...        |
| <i>Arpc3</i>        | 122.841936        | 14.251           | 82        | 5.753982             | 12        | actin related protein 2/3 ...        |
| <i>Anapc7</i>       | 122.872489        | 22.099           | 88        | 3.982081             | 12        | anaphase promoting complex...        |
| <i>Atp2a2</i>       | 122.903521        | 48.713           | 123       | 2.524993             | 12        | ATPase, Ca++ transporting,...        |
| <i>Ift81</i>        | 123.000212        | 64.315           | 45        | 0.699681             | 12        | intraflagellar transport 8...        |
| <i>P2rx7</i>        | 123.093919        | 11.35            | 23        | 2.026432             | 12        | purinergic receptor P2X, l...        |
| <i>P2rx4</i>        | 123.157565        | 21.486           | 56        | 2.606348             | 12        | purinergic receptor P2X, l...        |
| <i>Camkk2</i>       | 123.183206        | 31.097           | 132       | 4.244782             | 12        | calcium/calmodulin-depende...        |
| <i>Anapc5</i>       | 123.237469        | 33.879           | 172       | 5.076891             | 12        | anaphase-promoting complex...        |
| <b><i>Rnf34</i></b> | <b>123.300196</b> | <b>18.758</b>    | <b>52</b> | <b>2.772151</b>      | <b>12</b> | <b>ring finger protein 34</b>        |
| <i>Fbxl10</i>       | 123.320686        | 118.415          | 56        | 0.472913             | 12        | F-box and leucine-rich rep...        |
| A930024E05Rik       | 123.439362        | 8.986            | 2         | 0.222568             |           | RIKEN cDNA A930024E05 gene           |
| <i>Orai1</i>        | 123.465082        | 15.379           | 1         | 0.065024             | 12        | ORAI calcium release-activ...        |
| <i>Morn3</i>        | 123.487135        | 9.694            | 25        | 2.578915             | 12        | MORN repeat containing 3             |
| <i>Tmem120b</i>     | 123.526283        | 41.171           | 62        | 1.505914             | 12        | transmembrane protein 120B           |
| <i>Rhof</i>         | 123.568188        | 14.45            | 0         | 0                    | 12        | ras homolog gene family, m...        |



|                     |                   |               |            |                 |           |                                 |
|---------------------|-------------------|---------------|------------|-----------------|-----------|---------------------------------|
| <i>Hpd</i>          | 123.621815        | 10.88         | 2          | 0.183824        | 12        | 4-hydroxyphenylpyruvic aci...   |
| <i>Psmc9</i>        | 123.678198        | 21.936        | 0          | 0               | 12        | proteasome (prosome, macro...   |
| <i>Wdr66</i>        | 123.728136        | 1.458         | 4          | 2.743484        | 12        | WD repeat domain 66             |
| <i>Bcl7a</i>        | 123.794542        | 29.546        | 28         | 0.947675        | 12        | B-cell CLL/lymphoma 7A          |
| <i>Mlxip</i>        | 123.844827        | 63.113        | 143        | 2.265777        | 12        | MLX interacting protein         |
| <i>Il31</i>         | 123.930166        | 2.428         | 9          | 3.706755        | 12        | interleukin 31                  |
| <i>Lrrc43</i>       | 123.939333        | 18.88         | 23         | 1.21822         | 12        | leucine rich repeat contai...   |
| <i>B3gnt4</i>       | 123.960468        | 1.423         | 6          | 4.216444        | 12        | UDP-GlcNAc:betaGal beta-1,...   |
| <i>Diablo</i>       | 123.961338        | 12.835        | 17         | 1.324503        | 12        | diablo homolog (Drosophila...   |
| <i>Vps33a</i>       | 123.97911         | 43.905        | 65         | 1.480469        | 12        | vacuolar protein sorting 3...   |
| <i>Clip1</i>        | 124.029078        | 105.222       | 195        | 1.853225        | 12        | CAP-GLY domain containing ...   |
| <i>Zcchc8</i>       | 124.149806        | 21.143        | 58         | 2.743225        | 12        | zinc finger, CCHC domain c...   |
| <i>Rsrc2</i>        | 124.178438        | 20.983        | 42         | 2.00162         | 12        | arginine/serine-rich coile...   |
| <b><i>Kntc1</i></b> | <b>124.199734</b> | <b>71.868</b> | <b>103</b> | <b>1.433183</b> | <b>12</b> | <b>kinetochore associated 1</b> |
| <i>Gpr109a</i>      | 124.313585        | 1.92          | 6          | 3.125           | 12        | G protein-coupled receptor...   |
| <i>Gpr81</i>        | 124.326986        | 3.026         | 0          | 0               | 12        | G protein-coupled receptor...   |
| <i>Denr</i>         | 124.357283        | 21.558        | 2          | 0.092773        | 12        | density-regulated protein       |
| <i>Hip1r</i>        | 124.423647        | 29.562        | 4          | 0.135309        | 12        | huntingtin interacting pro...   |
| <i>Vps37b</i>       | 124.454649        | 27.62         | 3          | 0.108617        |           | vacuolar protein sorting 3...   |
| <i>Abcb9</i>        | 124.511865        | 33.942        | 46         | 1.355253        | 12        | ATP-binding cassette, sub-...   |
| <i>Ogfod2</i>       | 124.562346        | 3.139         | 11         | 3.504301        | 12        | 2-oxoglutarate and iron-de...   |
| <i>Arl6ip4</i>      | 124.566116        | 2.088         | 7          | 3.35249         | 12        | ADP-ribosylation factor-li...   |
| <i>Pitpnm2</i>      | 124.568698        | 97.729        | 85         | 0.869752        | 12        | phosphatidylinositol trans...   |
| <i>Mphosph9</i>     | 124.700967        | 77.493        | 70         | 0.903307        | 12        | M-phase phosphoprotein 9        |
| 2810006K23Rik       | 124.778097        | 12.033        | 19         | 1.578991        |           | RIKEN cDNA 2810006K23 gene      |
| <i>Cdk2ap1</i>      | 124.795447        | 9.19          | 5          | 0.54407         | 12        | CDK2 (cyclin-dependent kin...   |

|                 |            |        |     |           |    |                                           |
|-----------------|------------|--------|-----|-----------|----|-------------------------------------------|
| <i>Sbno1</i>    | 124.81871  | 57.213 | 218 | 3.810323  | 12 | sno, strawberry notch homo...             |
| <i>Setd8</i>    | 124.889938 | 22.378 | 0   | 0         | 12 | SET domain containing (lys...             |
| <i>Rilpl2</i>   | 124.913273 | 14.971 | 0   | 0         | 12 | Rab interacting lysosomal ...             |
| <i>Rilpl1</i>   | 124.943088 | 38.312 | 0   | 0         | 12 | Rab interacting lysosomal ...             |
| <i>Tmed2</i>    | 124.990799 | 9.713  | 4   | 0.411819  | 12 | transmembrane emp24 domain...             |
| <i>Ddx55</i>    | 125.002872 | 16.075 | 11  | 0.684292  | 12 | DEAD (Asp-Glu-Ala-Asp) box...             |
| <i>Eif2b1</i>   | 125.020222 | 8.844  | 1   | 0.113071  | 12 | eukaryotic translation ini...             |
| <i>Gtf2h3</i>   | 125.029179 | 17.671 | 11  | 0.622489  | 12 | general transcription fact...             |
| <i>Tctn2</i>    | 125.048757 | 28.901 | 55  | 1.903048  | 12 | tectonic family member 2                  |
| <i>Atp6v0a2</i> | 125.079647 | 122.87 | 241 | 1.961423  | 12 | ATPase, H <sup>+</sup> transporting, l... |
| <i>Dnahc10</i>  | 125.281834 | 32.838 | 116 | 3.532493  | 12 | dynein, axonemal, heavy ch...             |
| <i>Ccdc92</i>   | 125.314801 | 27.79  | 64  | 2.302987  | 12 | coiled-coil domain contain...             |
| <i>Zfp664</i>   | 125.343074 | 25.926 | 40  | 1.542853  | 12 | zinc finger protein 664                   |
| 3110032G18Rik   | 125.483844 | 9.073  | 32  | 3.526948  |    | RIKEN cDNA 3110032G18 gene                |
| <i>Ncor2</i>    | 125.497524 | 162.06 | 208 | 1.283475  | 12 | nuclear receptor co-repres...             |
| <i>Ubg</i>      | 125.675638 | 0.048  | 1   | 20.833333 |    | ubiquitin, beta-galactosid...             |
| <i>EG216818</i> | 125.675715 | 0.227  | 0   | 0         |    | predicted gene, EG216818                  |
| <i>Scarb1</i>   | 125.757459 | 63.985 | 115 | 1.797296  | 12 | scavenger receptor class B...             |
| <i>Ubc</i>      | 125.866334 | 4.053  | 1   | 0.246731  | 12 | ubiquitin C                               |
| <i>Dhx37</i>    | 125.894773 | 19.645 | 37  | 1.883431  | 12 | DEAH (Asp-Glu-Ala-His) box...             |
| <i>Bri3bp</i>   | 125.921937 | 19.318 | 28  | 1.449425  | 12 | Bri3 binding protein                      |
| <i>Aacs</i>     | 125.956242 | 41.531 | 180 | 4.334112  | 12 | acetoacetyl-CoA synthetase                |
| <i>Tmem132b</i> | 126.102857 | 76.286 | 128 | 1.677896  | 12 | transmembrane protein 132B                |
| 1700048F04Rik   | 126.409148 | 23.852 | 63  | 2.641288  |    | RIKEN cDNA 1700048F04 gene                |
| 4933438B17Rik   | 127.511158 | 57.741 | 111 | 1.922378  |    | RIKEN cDNA 4933438B17 gene                |
| 4930572K03Rik   | 127.650934 | 13.792 | 4   | 0.290023  |    | RIKEN cDNA 4930572K03 gene                |

|                 |            |         |      |          |    |                               |
|-----------------|------------|---------|------|----------|----|-------------------------------|
| 4930548G05Rik   | 127.681064 | 13.637  | 2    | 0.14666  |    | RIKEN cDNA 4930548G05 gene    |
| 2810482M11Rik   | 127.722195 | 45.511  | 127  | 2.790534 |    | RIKEN cDNA 2810482M11 gene    |
| <i>Tmem132c</i> | 127.722195 | 323.965 | 535  | 1.651413 | 12 | transmembrane protein 132C    |
| 1700085B03Rik   | 127.737231 | 24.724  | 62   | 2.507685 |    | RIKEN cDNA 1700085B03 gene    |
| <i>Slc15a4</i>  | 128.076035 | 21.727  | 24   | 1.104616 | 12 | solute carrier family 15, ... |
| <i>Glt1d1</i>   | 128.112631 | 75.259  | 124  | 1.647643 | 12 | glycosyltransferase 1 doma... |
| <i>Tmem132d</i> | 128.26386  | 675.077 | 1221 | 1.808683 | 12 | transmembrane protein 132D    |
| <i>Fzd10</i>    | 129.10698  | 2.988   | 12   | 4.016064 | 12 | frizzled homolog 10 (Droso... |
| <i>Piwill</i>   | 129.24212  | 19.229  | 9    | 0.468043 | 12 | piwi-like homolog 1 (Droso... |
| <i>Rimbp2</i>   | 129.266275 | 192.962 | 379  | 1.964117 | 12 | RIMS binding protein 2        |
| <i>Stx2</i>     | 129.490435 | 24.004  | 74   | 3.08282  | 12 | syntaxin 2                    |
| <i>Ran</i>      | 129.52603  | 4.166   | 18   | 4.320691 | 12 | RAN, member RAS oncogene f... |
| <i>Gpr133</i>   | 129.602624 | 107.85  | 435  | 4.03338  | 12 | G protein-coupled receptor... |

C. Chromosome 9 QTL genes.

| Gene Symbol      | Mb Start (mm9) | Gene Length (Kb) | SNP Count | SNP Density (SNP/Kb) | Human Chr | Gene Description              |
|------------------|----------------|------------------|-----------|----------------------|-----------|-------------------------------|
| <i>Ddx10</i>     | 52.987979      | 0.05             | 0         | 0                    | 11        | DEAD (Asp-Glu-Ala-Asp) box... |
| 4930510E17Rik    | 53.072719      | 16.371           | 1         | 0.061084             |           | RIKEN cDNA 4930510E17 gene    |
| <i>Exph5</i>     | 53.109774      | 75.845           | 5         | 0.065924             | 11        | exophilin 5                   |
| <i>Kdelc2</i>    | 53.192127      | 17.845           | 1         | 0.056038             | 11        | KDEL (Lys-Asp-Glu-Leu) con... |
| 4930550C14Rik    | 53.21339       | 27.518           | 2         | 0.07268              |           | RIKEN cDNA 4930550C14 gene    |
| <i>Atm</i>       | 53.245226      | 99.55            | 6         | 0.060271             | 11        | ataxia telangiectasia muta... |
| <i>Npat</i>      | 53.345151      | 38.581           | 5         | 0.129597             | 11        | nuclear protein in the AT ... |
| 1110050P16Rik    | 53.375857      | 1.369            | 0         | 0                    |           | RIKEN cDNA 1110050P16 gene    |
| <i>Acat1</i>     | 53.388626      | 29.829           | 4         | 0.134098             | 11        | acetyl-Coenzyme A acetyltr... |
| <i>Cul5</i>      | 53.422686      | 52.926           | 14        | 0.26452              | 11        | cullin 5                      |
| <i>Rab39</i>     | 53.492214      | 22.123           | 0         | 0                    | 11        | RAB39, member RAS oncogene... |
| <i>Slc35f2</i>   | 53.619341      | 46.627           | 7         | 0.150128             | 11        | solute carrier family 35, ... |
| <i>Sln</i>       | 53.698057      | 3.599            | 4         | 1.11142              | 11        | sarcolipin                    |
| <i>Elmod1</i>    | 53.759266      | 63.842           | 65        | 1.018139             | 11        | ELMO domain containing 1      |
| <i>Tnfrsf8l3</i> | 53.873412      | 42.806           | 61        | 1.425034             | 15        | tumor necrosis factor, alp... |
| <i>Cyp19a1</i>   | 54.013743      | 27.506           | 48        | 1.745074             | 15        | cytochrome P450, family 19... |
| 1700104A03Rik    | 54.113914      | 3.192            | 0         | 0                    |           | RIKEN cDNA 1700104A03 gene    |
| <i>Gldn</i>      | 54.134292      | 55.292           | 12        | 0.21703              | 15        | gliomedin                     |
| 4933412E14Rik    | 54.38679       | 6.037            | 4         | 0.662581             |           | RIKEN cDNA 4933412E14 gene    |
| <i>Cib2</i>      | 54.393158      | 14.728           | 2         | 0.135796             | 15        | calcium and integrin bindi... |
| <i>Idh3a</i>     | 54.434317      | 18.152           | 9         | 0.495813             | 15        | isocitrate dehydrogenase 3... |
| <i>Acsbg1</i>    | 54.452803      | 56.889           | 7         | 0.123047             | 15        | acyl-CoA synthetase bubble... |
| <i>Dnaja4</i>    | 54.547365      | 16.754           | 0         | 0                    | 15        | DnaJ (Hsp40) homolog, subf... |

|                 |           |         |     |          |    |                               |
|-----------------|-----------|---------|-----|----------|----|-------------------------------|
| <i>Wdr61</i>    | 54.564961 | 17.34   | 0   | 0        | 15 | WD repeat domain 61           |
| <i>Crabp1</i>   | 54.612614 | 8.302   | 0   | 0        | 15 | cellular retinoic acid bin... |
| <i>Ireb2</i>    | 54.711595 | 46.244  | 10  | 0.216244 | 15 | iron responsive element bi... |
| C630028N24Rik   | 54.765096 | 32.635  | 0   | 0        |    | RIKEN cDNA C630028N24 gene    |
| <i>PsmA4</i>    | 54.798665 | 7.172   | 0   | 0        | 15 | proteasome (prosome, macro... |
| <i>Chrna5</i>   | 54.828903 | 25.478  | 0   | 0        | 15 | cholinergic receptor, nico... |
| <i>Chrna3</i>   | 54.859149 | 15.217  | 0   | 0        | 15 | cholinergic receptor, nico... |
| <i>ChrnB4</i>   | 54.875962 | 20.389  | 4   | 0.196184 | 15 | cholinergic receptor, nico... |
| 1700071A11Rik   | 54.996288 | 0.904   | 0   | 0        |    | RIKEN cDNA 1700071A11 gene    |
| <i>Ube2q2</i>   | 54.997184 | 58.151  | 0   | 0        | 15 | ubiquitin-conjugating enzy... |
| <i>D9Wsu74e</i> | 55.00276  | 0.05    | 0   | 0        |    | DNA segment, Chr 9, Wayne ... |
| <i>Fbxo22</i>   | 55.056741 | 15.499  | 1   | 0.06452  | 15 | F-box protein 22              |
| <i>Nrg4</i>     | 55.068028 | 63.404  | 15  | 0.236578 | 15 | neuregulin 4                  |
| <i>AI118078</i> | 55.174755 | 111.396 | 59  | 0.529642 |    | expressed sequence AI11807... |
| <i>EtfA</i>     | 55.302242 | 57.808  | 4   | 0.069195 | 15 | electron transferring flav... |
| 9430072B17Rik   | 55.30294  | 1.283   | 0   | 0        |    | RIKEN cDNA 9430072B17 gene    |
| <i>Isl2</i>     | 55.388955 | 5.03    | 0   | 0        | 15 | insulin related protein 2 ... |
| <i>Scaper</i>   | 55.397689 | 388.233 | 419 | 1.079249 | 15 | S phase cyclin A-associate... |
| 8430427G23Rik   | 55.596521 | 0.05    | 0   | 0        |    | RIKEN cDNA 8430427G23 gene    |
| 1110019B24Rik   | 55.746763 | 1.04    | 3   | 2.884615 |    | RIKEN cDNA 1110019B24 gene    |
| 4930563M21Rik   | 55.810395 | 18.344  | 70  | 3.815962 |    | RIKEN cDNA 4930563M21 gene    |
| <i>Rcn2</i>     | 55.889651 | 17.239  | 43  | 2.494344 | 15 | reticulocalbin 2              |
| <i>Pstpip1</i>  | 55.937782 | 38.915  | 46  | 1.182063 | 15 | proline-serine-threonine p... |
| <i>Tspan3</i>   | 55.98369  | 25.165  | 6   | 0.238426 | 15 | tetraspanin 3                 |
| C230081A13Rik   | 56.048935 | 216.922 | 52  | 0.239718 |    | RIKEN cDNA C230081A13 gene    |
| <i>Hmg20a</i>   | 56.266652 | 78.091  | 57  | 0.729918 | 15 | high mobility group 20A       |

|               |           |        |    |          |    |                                |
|---------------|-----------|--------|----|----------|----|--------------------------------|
| 5830432F11Rik | 56.296511 | 1.052  | 0  | 0        |    | RIKEN cDNA 5830432F11 gene     |
| <i>Lingo1</i> | 56.466281 | 66.779 | 23 | 0.34442  | 15 | leucine rich repeat and Ig...  |
| <i>Odf3l1</i> | 56.696465 | 3.305  | 0  | 0        | 15 | outer dense fiber of sperm...  |
| <i>Cspg4</i>  | 56.71291  | 34.767 | 5  | 0.143815 | 15 | chondroitin sulfate proteo...  |
| <i>Sh3px3</i> | 56.765006 | 11.172 | 3  | 0.268528 | 15 | SH3 and PX domain containi...  |
| 4930442G15Rik | 56.779437 | 1.915  | 0  | 0        |    | RIKEN cDNA 4930442G15 gene     |
| <i>Imp3</i>   | 56.785306 | 0.899  | 0  | 0        | 15 | IMP3, U3 small nucleolar r...  |
| <i>Snupn</i>  | 56.79873  | 32.276 | 4  | 0.123931 | 15 | snurportin 1                   |
| B930032C10Rik | 56.82168  | 0.865  | 0  | 0        |    | RIKEN cDNA B930032C10 gene     |
| <i>Ptpn9</i>  | 56.842774 | 67.84  | 24 | 0.353774 | 15 | protein tyrosine phosphata...  |
| <i>Sin3a</i>  | 56.919846 | 56.329 | 67 | 1.189441 | 15 | transcriptional regulator,...  |
| 2700012I20Rik | 56.923022 | 0.798  | 0  | 0        |    | RIKEN cDNA 2700012I20 gene     |
| 2410133F24Rik | 56.928715 | 0.05   | 0  | 0        |    | RIKEN cDNA 2410133F24 gene     |
| <i>Man2c1</i> | 56.978583 | 11.434 | 36 | 3.148504 | 15 | mannosidase, alpha, class ...  |
| <i>Neil1</i>  | 56.991062 | 3.779  | 12 | 3.175443 | 15 | nei endonuclease VIII-like...  |
| <i>Commd4</i> | 57.002847 | 3.259  | 0  | 0        | 15 | COMM domain containing 4       |
| 1700041C23Rik | 57.023081 | 10.829 | 25 | 2.308616 |    | RIKEN cDNA 1700041C23 gene     |
| <i>14-Sep</i> | 57.050459 | 10.131 | 43 | 4.244398 |    | septin 14                      |
| <i>Trcg1</i>  | 57.084362 | 13.309 | 22 | 1.653017 |    | taste receptor protein 1       |
| 4930430J02Rik | 57.238876 | 9.295  | 2  | 0.215169 |    | RIKEN cDNA 4930430J02 gene     |
| <i>Ppdc</i>   | 57.26047  | 27.451 | 35 | 1.274999 | 15 | phosphopantothenoylecystein... |
| <i>Scamp5</i> | 57.289133 | 26.698 | 22 | 0.824032 | 15 | secretory carrier membrane...  |
| <i>Rpp25</i>  | 57.351908 | 1.346  | 0  | 0        | 15 | ribonuclease P 25 subunit ...  |
| <i>Cox5a</i>  | 57.369038 | 11.195 | 3  | 0.267977 | 15 | cytochrome c oxidase, subu...  |
| <i>Mpi</i>    | 57.392074 | 8.485  | 0  | 0        | 15 | mannose phosphate isomeras...  |
| <i>Scamp2</i> | 57.40875  | 27.855 | 4  | 0.143601 | 15 | secretory carrier membrane...  |

|                |           |        |     |          |    |                               |
|----------------|-----------|--------|-----|----------|----|-------------------------------|
| <i>Ulk3</i>    | 57.437274 | 6.759  | 2   | 0.295902 | 15 | unc-51-like kinase 3 (C. e... |
| <i>Cplx3</i>   | 57.447798 | 6.241  | 1   | 0.160231 | 15 | complexin 3                   |
| <i>Lman1l</i>  | 57.454839 | 13.742 | 3   | 0.218309 | 15 | lectin, mannose-binding 1 ... |
| <i>Csk</i>     | 57.474452 | 18.535 | 2   | 0.107904 | 15 | c-src tyrosine kinase         |
| <i>Cyp1a2</i>  | 57.524743 | 6.719  | 0   | 0        | 15 | cytochrome P450, family 1,... |
| <i>Cyp1a1</i>  | 57.535734 | 15.894 | 2   | 0.125834 | 15 | cytochrome P450, family 1,... |
| <i>Edc3</i>    | 57.556375 | 41.594 | 11  | 0.264461 | 15 | enhancer of mRNA decapping... |
| <i>Clk3</i>    | 57.598517 | 15.15  | 7   | 0.462046 | 15 | CDC-like kinase 3             |
| <i>Arid3b</i>  | 57.638315 | 43.726 | 25  | 0.571742 | 15 | AT rich interactive domain... |
| <i>Ubl7</i>    | 57.758792 | 18.983 | 10  | 0.526787 | 15 | ubiquitin-like 7 (bone mar... |
| <i>Sema7a</i>  | 57.787941 | 22.731 | 46  | 2.023668 | 15 | sema domain, immunoglobuli... |
| <i>Cyp11a1</i> | 57.862823 | 12.007 | 37  | 3.081536 | 15 | cytochrome P450, family 11... |
| <i>Ccdc33</i>  | 57.876488 | 73.544 | 204 | 2.77385  | 15 | coiled-coil domain contain... |
| <i>Stra6</i>   | 57.977155 | 24.605 | 11  | 0.447064 | 15 | stimulated by retinoic aci... |
| <i>Islr</i>    | 58.004075 | 2.874  | 16  | 5.567154 | 15 | immunoglobulin superfamily... |
| <i>Islr2</i>   | 58.044104 | 8.022  | 0   | 0        | 15 | immunoglobulin superfamily... |
| <i>Pml</i>     | 58.064986 | 32.607 | 6   | 0.18401  | 15 | promyelocytic leukemia        |
| <i>Stoml1</i>  | 58.100998 | 9.327  | 1   | 0.107216 | 15 | stomatin-like 1               |
| <i>Loxl1</i>   | 58.136407 | 24.586 | 3   | 0.122021 | 15 | lysyl oxidase-like 1          |
| <i>Tbc1d21</i> | 58.20761  | 10.566 | 3   | 0.28393  | 15 | TBC1 domain family, member... |
| 1700072B07Rik  | 58.21831  | 3.68   | 1   | 0.271739 |    | RIKEN cDNA 1700072B07 gene    |
| 4930461G14Rik  | 58.302979 | 14.451 | 49  | 3.390769 |    | RIKEN cDNA 4930461G14 gene    |
| 6030419C18Rik  | 58.336409 | 11.14  | 15  | 1.346499 |    | RIKEN cDNA 6030419C18 gene    |
| <i>Cd276</i>   | 58.372106 | 16.641 | 20  | 1.201851 | 15 | CD276 antigen                 |
| <i>Nptn</i>    | 58.430046 | 70.64  | 122 | 1.727067 |    | neuroplastin                  |
| 2410076I21Rik  | 58.500689 | 88.674 | 270 | 3.044861 |    | RIKEN cDNA 2410076I21 gene    |

|                     |                  |                |            |                 |           |                                      |
|---------------------|------------------|----------------|------------|-----------------|-----------|--------------------------------------|
| A130026P03Rik       | 58.514471        | 2.178          | 5          | 2.295684        |           | RIKEN cDNA A130026P03 gene           |
| <i>Hcn4</i>         | 58.671318        | 37.444         | 59         | 1.575686        | 15        | hyperpolarization-activate...        |
| <i>Neo1</i>         | 58.722486        | 161.762        | 381        | 2.355312        | 15        | neogenin                             |
| <i>Adpgk</i>        | 59.139378        | 24.629         | 47         | 1.908319        | 15        | ADP-dependent glucokinase            |
| <i>Bbs4</i>         | 59.169772        | 31.495         | 36         | 1.143039        | 15        | Bardet-Biedl syndrome 4 ho...        |
| <i>Arih1</i>        | 59.23636         | 97.821         | 108        | 1.104057        | 15        | ariadne ubiquitin-conjugat...        |
| <i>Tmem202</i>      | 59.366491        | 6.817          | 1          | 0.146692        | 15        | transmembrane protein 202            |
| <i>Hexa</i>         | 59.387473        | 25.439         | 0          | 0               | 15        | hexosaminidase A                     |
| <i>Brunol6</i>      | 59.426143        | 28.956         | 0          | 0               | 15        | bruno-like 6, RNA binding ...        |
| <i>Parp6</i>        | 59.46509         | 32.986         | 0          | 0               | 15        | poly (ADP-ribose) polymera...        |
| <i>Pkm2</i>         | 59.504414        | 22.768         | 0          | 0               | 15        | pyruvate kinase, muscle              |
| 1700043A12Rik       | 59.50819         | 0.777          | 0          | 0               |           | RIKEN cDNA 1700043A12 gene           |
| 4933407I18Rik       | 59.527184        | 1.436          | 0          | 0               |           | RIKEN cDNA 4933407I18 gene           |
| <i>Gramd2</i>       | 59.55557         | 8.661          | 0          | 0               | 15        | GRAM domain containing 2             |
| <i>Senp8</i>        | 59.583692        | 14.725         | 1          | 0.067912        | 15        | SUMO/sentrin specific pept...        |
| <i>Myo9a</i>        | 59.726791        | 0.05           | 0          | 0               | 15        | myosin IXa                           |
| <i>Nr2e3</i>        | 59.790577        | 7.309          | 8          | 1.094541        | 15        | nuclear receptor subfamily...        |
| <b><i>Thsd4</i></b> | <b>59.817525</b> | <b>171.417</b> | <b>317</b> | <b>1.849291</b> | <b>15</b> | <b>thrombospondin, type I, do...</b> |
| B930001P03Rik       | 60.001122        | 1.93           | 3          | 1.554404        |           | RIKEN cDNA B930001P03 gene           |
| 5930427L02Rik       | 60.090883        | 2.197          | 0          | 0               |           | RIKEN cDNA 5930427L02 gene           |
| 2010001M07Rik       | 60.181948        | 0.827          | 2          | 2.41838         |           | RIKEN cDNA 2010001M07 gene           |
| 9230112J17Rik       | 60.371463        | 0.737          | 2          | 2.713704        |           | RIKEN cDNA 9230112J17 gene           |
| <i>Lrrc49</i>       | 60.435045        | 100.896        | 13         | 0.128846        | 15        | leucine rich repeat contai...        |
| B930082K07Rik       | 60.535525        | 2.679          | 0          | 0               |           | RIKEN cDNA B930082K07 gene           |
| <i>Larp6</i>        | 60.560927        | 25.681         | 2          | 0.077879        | 15        | La ribonucleoprotein domai...        |
| 1700036A12Rik       | 60.590926        | 27.156         | 4          | 0.147297        |           | RIKEN cDNA 1700036A12 gene           |



|                |           |         |     |          |    |                                 |
|----------------|-----------|---------|-----|----------|----|---------------------------------|
| <i>Uaca</i>    | 60.642354 | 85.823  | 47  | 0.547639 | 15 | uveal autoantigen with coi...   |
| A430102L10     | 60.864875 | 2.729   | 0   | 0        |    | hypothetical protein A4301...   |
| 4933433G08Rik  | 60.950818 | 2.374   | 9   | 3.79107  |    | RIKEN cDNA 4933433G08 gene      |
| I730028E13Rik  | 60.986321 | 6.745   | 10  | 1.48258  |    | RIKEN cDNA I730028E13 gene      |
| <i>Tle3</i>    | 61.220172 | 46.132  | 9   | 0.195092 | 15 | transducin-like enhancer o...   |
| <i>Rplp1</i>   | 61.761089 | 1.228   | 7   | 5.700326 | 15 | ribosomal protein, large, ...   |
| <i>Kif23</i>   | 61.7653   | 29.264  | 95  | 3.246309 | 15 | kinesin family member 23        |
| <i>Paqr5</i>   | 61.801544 | 73.053  | 8   | 0.10951  | 15 | progesterin and adipoQ recep... |
| 9530006O14Rik  | 61.854485 | 1.216   | 0   | 0        |    | RIKEN cDNA 9530006O14 gene      |
| <i>Glce</i>    | 61.905055 | 13.358  | 1   | 0.074862 | 15 | glucuronyl C5-epimerase         |
| 1700013K18Rik  | 62.115182 | 0.468   | 1   | 2.136752 |    | RIKEN cDNA 1700013K18 gene      |
| <i>Spesp1</i>  | 62.118535 | 11.451  | 31  | 2.707187 | 15 | sperm equatorial segment p...   |
| <i>Anp32a</i>  | 62.189149 | 37.46   | 135 | 3.603844 | 15 | acidic (leucine-rich) nucl...   |
| <i>Coro2b</i>  | 62.267298 | 117.553 | 256 | 2.177741 | 15 | coronin, actin binding pro...   |
| <i>Itgal1</i>  | 62.525661 | 106.125 | 188 | 1.771496 | 15 | integrin, alpha 11              |
| <i>Fem1b</i>   | 62.639635 | 19.82   | 1   | 0.050454 | 15 | feminization 1 homolog b (...)  |
| <i>Cln6</i>    | 62.686593 | 13.216  | 3   | 0.226998 | 15 | ceroid-lipofuscinosis, neu...   |
| <i>Calml4</i>  | 62.70591  | 17.814  | 1   | 0.056136 | 15 | calmodulin-like 4               |
| <i>Pias1</i>   | 62.727883 | 100.803 | 8   | 0.079363 | 15 | protein inhibitor of activ...   |
| <i>Lbxcor1</i> | 62.985982 | 8.805   | 8   | 0.908575 | 15 | ladybird homeobox 1 homolo...   |
| <i>Map2k5</i>  | 63.011576 | 214.083 | 404 | 1.887119 | 15 | mitogen-activated protein ...   |
| 2300009A05Rik  | 63.192492 | 0.05    | 0   | 0        |    | RIKEN cDNA 2300009A05 gene      |
| <i>Iqch</i>    | 63.269263 | 181.024 | 414 | 2.28699  | 15 | IQ motif containing H           |
| 2310007F21Rik  | 63.450461 | 39.235  | 110 | 2.803619 |    | RIKEN cDNA 2310007F21 gene      |
| <i>Smad3</i>   | 63.494573 | 111.228 | 130 | 1.16877  | 15 | MAD homolog 3 (Drosophila)      |
| <i>Smad6</i>   | 63.800949 | 68.179  | 140 | 2.053418 | 15 | MAD homolog 6 (Drosophila)      |

|                     |                  |               |           |                 |           |                                      |
|---------------------|------------------|---------------|-----------|-----------------|-----------|--------------------------------------|
| 1700055C04Rik       | 63.886271        | 3.001         | 6         | 1.999334        |           | RIKEN cDNA 1700055C04 gene           |
| 1110036E04Rik       | 63.897635        | 4.272         | 9         | 2.106742        |           | RIKEN cDNA 1110036E04 gene           |
| 2600006L11Rik       | 63.928567        | 7.285         | 0         | 0               |           | RIKEN cDNA 2600006L11 gene           |
| <i>Lctl</i>         | 63.964953        | 20.972        | 0         | 0               | 15        | lactase-like                         |
| <i>Zwilch</i>       | 63.984952        | 35.786        | 3         | 0.083832        | 15        | Zwilch, kinetochore associ...        |
| <i>Rpl4</i>         | 64.021193        | 5.176         | 0         | 0               | 15        | ribosomal protein L4                 |
| <i>Snpc5</i>        | 64.027103        | 3.392         | 0         | 0               | 15        | small nuclear RNA activati...        |
| <i>Map2k1</i>       | 64.033599        | 67.813        | 98        | 1.445151        | 15        | mitogen-activated protein ...        |
| <i>Uchl4</i>        | 64.083007        | 1.162         | 0         | 0               | 15        | ubiquitin carboxyl-termina...        |
| <b><i>Tipin</i></b> | <b>64.129413</b> | <b>23.186</b> | <b>89</b> | <b>3.838523</b> | <b>15</b> | <b>timeless interacting prote...</b> |
| <i>Dis3l</i>        | 64.154815        | 34.182        | 82        | 2.398923        | 15        | DIS3 mitotic control homol...        |
| <i>Megf11</i>       | 64.233432        | 315.349       | 201       | 0.637389        | 15        | multiple EGF-like-domains ...        |
| <i>Rab11a</i>       | 64.563106        | 22.457        | 48        | 2.137418        | 15        | RAB11a, member RAS oncogen...        |
| F730015K02Rik       | 64.659266        | 29.65         | 49        | 1.652614        |           | RIKEN cDNA F730015K02 gene           |
| <i>Slc24a1</i>      | 64.770667        | 28.747        | 0         | 0               | 15        | solute carrier family 24 (...)       |
| 2010321M09Rik       | 64.808638        | 26.143        | 3         | 0.114753        |           | RIKEN cDNA 2010321M09 gene           |
| <i>Ptplad1</i>      | 64.834789        | 34.735        | 4         | 0.115158        | 15        | protein tyrosine phosphata...        |
| <i>Dpp8</i>         | 64.880264        | 50.194        | 6         | 0.119536        | 15        | dipeptidylpeptidase 8                |
| <i>Nope</i>         | 64.949301        | 36.449        | 2         | 0.054871        | 15        | neighbor of Punc E11                 |
| <i>Punc</i>         | 64.988995        | 44.682        | 105       | 2.34994         | 15        | putative neuronal cell adh...        |
| <i>Parp16</i>       | 65.062496        | 24.53         | 57        | 2.323685        | 15        | poly (ADP-ribose) polymera...        |
| <i>Cilp</i>         | 65.112986        | 15.426        | 40        | 2.593025        | 15        | cartilage intermediate lay...        |
| <i>Clpx</i>         | 65.142101        | 36.364        | 71        | 1.95248         | 15        | caseinolytic peptidase X (...)       |
| <i>Pdcd7</i>        | 65.193874        | 13.576        | 17        | 1.25221         | 15        | programmed cell death prot...        |
| 5430433E21Rik       | 65.23649         | 2.969         | 6         | 2.020882        |           | RIKEN cDNA 5430433E21 gene           |
| <i>Rasl12</i>       | 65.246343        | 14.162        | 26        | 1.835899        | 15        | RAS-like, family 12                  |

|                |           |         |     |          |    |                               |
|----------------|-----------|---------|-----|----------|----|-------------------------------|
| <i>Ostb</i>    | 65.260559 | 10.021  | 39  | 3.891827 | 15 | organic solute transporter... |
| <i>Ankdd1a</i> | 65.282674 | 0.05    | 0   | 0        | 15 | ankyrin repeat and death d... |
| <i>Mtfmt</i>   | 65.283588 | 17.273  | 63  | 3.647311 | 15 | mitochondrial methionyl-tR... |
| <i>Spg21</i>   | 65.308743 | 27.534  | 28  | 1.016925 | 15 | spastic paraplegia 21 homo... |
| <i>Plekho2</i> | 65.40219  | 25.651  | 69  | 2.689954 | 15 | pleckstrin homology domain... |
| <i>Pif1</i>    | 65.435011 | 8.758   | 22  | 2.511989 | 15 | PIF1 5'-to-3' DNA helicase... |
| <i>Rbpms2</i>  | 65.478388 | 29.937  | 56  | 1.870595 | 15 | RNA binding protein with m... |
| <i>Oaz2</i>    | 65.524354 | 13.753  | 33  | 2.399476 | 15 | ornithine decarboxylase an... |
| <i>Zfp609</i>  | 65.539389 | 135.982 | 205 | 1.507552 | 15 | zinc finger protein 609       |
| <i>Trip4</i>   | 65.680031 | 76.562  | 113 | 1.475928 | 15 | thyroid hormone receptor i... |
| 2810417H13Rik  | 65.738129 | 13.229  | 18  | 1.360647 |    | RIKEN cDNA 2810417H13 gene    |
| D030028M11Rik  | 65.743728 | 2.342   | 5   | 2.134927 |    | RIKEN cDNA D030028M11 gene    |
| <i>Csnk1g1</i> | 65.756816 | 136.005 | 343 | 2.521966 | 15 | casein kinase 1, gamma 1      |
| <i>Ppib</i>    | 65.907975 | 6.461   | 10  | 1.547748 | 15 | peptidylprolyl isomerase B    |
| <i>Snx22</i>   | 65.912982 | 4.556   | 2   | 0.438982 | 15 | sorting nexin 22              |
| <i>Snx1</i>    | 65.935933 | 36.76   | 60  | 1.632209 | 15 | sorting nexin 1               |
| 5730536A07Rik  | 65.974417 | 12.358  | 36  | 2.913093 |    | RIKEN cDNA 5730536A07 gene    |
| <i>Dapk2</i>   | 66.006032 | 114.017 | 211 | 1.850601 | 15 | death-associated kinase 2     |
| <i>Herc1</i>   | 66.305392 | 0.05    | 0   | 0        | 15 | hect (homologous to the E6... |
| <i>Fbxl22</i>  | 66.356265 | 6.118   | 1   | 0.163452 | 15 | F-box and leucine-rich rep... |
| <i>Usp3</i>    | 66.365687 | 75.1    | 11  | 0.146471 | 15 | ubiquitin specific peptida... |
| <i>Car12</i>   | 66.561492 | 53.159  | 35  | 0.658402 | 15 | carbonic anyhydrase 12        |
| <i>Aph1b</i>   | 66.623293 | 19.937  | 1   | 0.050158 | 15 | anterior pharynx defective... |
| <i>Aph1c</i>   | 66.6628   | 19.713  | 2   | 0.101456 |    | anterior pharynx defective... |
| <i>Rab8b</i>   | 66.69147  | 76.024  | 20  | 0.263075 | 15 | RAB8B, member RAS oncogene... |
| <i>Rps27l</i>  | 66.793924 | 3.392   | 0   | 0        | 15 | ribosomal protein S27-like    |

|               |           |         |     |          |    |                               |
|---------------|-----------|---------|-----|----------|----|-------------------------------|
| <i>Lactb</i>  | 66.803199 | 20.092  | 17  | 0.846108 | 15 | lactamase, beta               |
| <i>Tpm1</i>   | 66.870399 | 26.621  | 48  | 1.803088 | 15 | tropomyosin 1, alpha          |
| <i>Tln2</i>   | 67.064891 | 342.619 | 640 | 1.867964 | 15 | talin 2                       |
| 3300001A09Rik | 67.606382 | 2.358   | 1   | 0.424088 |    | RIKEN cDNA 3300001A09 gene    |
| <i>Vps13c</i> | 67.688202 | 155.239 | 58  | 0.373617 | 15 | vacuolar protein sorting 1... |
| 4930502A04Rik | 68.318708 | 49.299  | 98  | 1.98787  |    | RIKEN cDNA 4930502A04 gene    |
